# Supplementary material
Source: PubMed Central journal article supplement (PMC6790775)

## Supplementary Materials

**Table S1.** Results from permutational multivariate analysis of variance.

| <b>Source</b>              | <b>df</b> | <b>SS</b> | <b>MS</b> | <b>F</b> | <b>p</b> | <b>R<sup>2</sup></b> |
|----------------------------|-----------|-----------|-----------|----------|----------|----------------------|
| Assemblage                 | 1         | 36,365    | 36,365    | 10.31    | 0.001    | 0.18                 |
| Habitat                    | 2         | 45,341    | 22,671    | 2.89     | 0.006    | 0.13                 |
| Site(Habitat)              | 9         | 70,711    | 7,857     | 12.56    | 0.001    | 0.25                 |
| Assemblage * Habitat       | 2         | 13,750    | 6,875     | 1.95     | 0.019    | 0.06                 |
| Assemblage * Site(Habitat) | 9         | 31,746    | 3,527     | 5.64     | 0.001    | 0.19                 |
| Residual                   | 72        | 45,051    | 626       |          |          | 0.19                 |

**Table S2.** Results of pairwise comparisons among combinations of assemblages and habitats.

| <b>Groups</b>                                  | <b>t</b> | <b>p</b> |
|------------------------------------------------|----------|----------|
| <b>Death seagrass versus Life seagrass</b>     | 3.2142   | 0.001    |
| <b>Death seagrass versus Death sand</b>        | 4.4484   | 0.001    |
| <b>Death seagrass versus Life sand</b>         | 4.6868   | 0.001    |
| <b>Death seagrass versus Death transition</b>  | 2.1456   | 0.004    |
| <b>Death seagrass versus Life transition</b>   | 3.2345   | 0.001    |
| <b>Death transition versus Life transition</b> | 3.1618   | 0.001    |
| <b>Death sand versus Life sand</b>             | 4.0189   | 0.001    |
| <b>Death sand versus Death transition</b>      | 3.1778   | 0.001    |
| <b>Death sand versus Life transition</b>       | 3.4183   | 0.001    |
| <b>Life seagrass versus Death sand</b>         | 5.2886   | 0.001    |
| <b>Life seagrass versus Life sand</b>          | 4.3056   | 0.001    |
| <b>Life seagrass versus Death transition</b>   | 3.5576   | 0.001    |
| <b>Life seagrass versus Life transition</b>    | 2.7315   | 0.001    |
| <b>Life sand versus Death transition</b>       | 4.3733   | 0.001    |
| <b>Life sand versus Life transition</b>        | 2.1988   | 0.001    |

**Table S3.** Results of comparisons of LA and DA of samples for seagrass, open sand, and transition habitats using raw-score sample values, and random sample-standardized abundances to control for small-sample bias (10,000 iterations). Parameters analyzed were Spearman’s non-parametric rank-order correlation of species abundances (Spearman’s rho) and live-dead community similarity using Jaccard-Chao’s similarity index with an adjustment to control for the effects of unseen species (Chao et al. 2005). Significance codes: — not significant; \* significant at  $p < 0.05$ ; \*\* significant at  $p < 0.01$ , \*\*\* significant at  $p < 0.001$ .

| Habitat (mean)   | Habitat (mean) | Parameter    | Standardization | Test          | Result                 |
|------------------|----------------|--------------|-----------------|---------------|------------------------|
| Seagrass (0.692) | Sand (0.203)   | Jaccard-Chao | Raw-score       | Wilcoxon Test | Seagrass > Sand***     |
| Seagrass (0.692) | Transition     | Jaccard-Chao | Raw-score       | Wilcoxon Test | Seagrass > Transition* |
| Sand (0.203)     | Transition     | Jaccard-Chao | Raw-score       | Wilcoxon Test | Transition > Sand**    |
| Seagrass (0.469) | Sand (0.209)   | Spearman’s   | Raw-score       | Wilcoxon Test | Seagrass > Sand***     |
| Seagrass (0.469) | Transition     | Spearman’s   | Raw-score       | Wilcoxon Test | Seagrass > Transition* |
| Sand (0.209)     | Transition     | Spearman’s   | Raw-score       | Wilcoxon Test | Transition > Sand*     |
| Seagrass (0.426) | Sand (0.174)   | Jaccard-Chao | Sample-         | Two - Way     | Seagrass > Sand***     |
| Seagrass (0.426) | Transition     | Jaccard-Chao | Sample-         | Two - Way     | Seagrass >             |
| Sand (0.174)     | Transition     | Jaccard-Chao | Sample-         | Two - Way     | Transition > Sand**    |
| Seagrass (0.319) | Sand (0.164)   | Spearman’s   | Sample-         | Two - Way     | Seagrass > Sand***     |
| Seagrass (0.319) | Transition     | Spearman’s   | Sample-         | Two - Way     | Seagrass >             |
| Sand (0.164)     | Transition     | Spearman’s   | Sample-         | Two - Way     | Transition > Sand--    |

**Table S4.** Results of comparisons of DA size fraction proportions for samples associated with seagrass and open sand habitats. Mean relative contributions of size fractions for seagrass and open sand habitats are reported, as well as the results Welch two-sample t-tests of means for seagrass and open sand habitats for each size fraction. Finally,  $r^2$  correlations between NMDS1 axis and each size fraction are also presented. Significance codes: — not significant; \* significant at  $p < 0.05$ ; \*\* significant at  $p < 0.01$ , \*\*\* significant at  $p < 0.001$ .

|                                             | <2mm   | <4mm   | <8mm   |
|---------------------------------------------|--------|--------|--------|
| <b>Mean Sand</b>                            | 42.875 | 60.375 | 90.125 |
| <b>Mean Seagrass</b>                        | 53.75  | 64.167 | 91.417 |
| <b>T statistic</b>                          | -1.943 | -0.659 | -0.544 |
| <b>p-value</b>                              | 0.063  | 0.516  | 0.591  |
| <b>NMDS1 correlation (<math>r^2</math>)</b> | 0.13   | 0.01   | 0.03   |

**Figure S1.** Non-metric multidimensional scaling (NMDS) ordination of 48 samples representing 12 sites; three seagrass, four open sand, and five transition sites, respectively. The NMDS ordination ( $k = 3$  dimensions) was derived using Bray-Curtis dissimilarities applied to log-transformed (base 2) counts. Filled symbols represent LA and open symbols represent DA. Site numbers, i.e. unique spatial identifiers, are indicated for each sample.

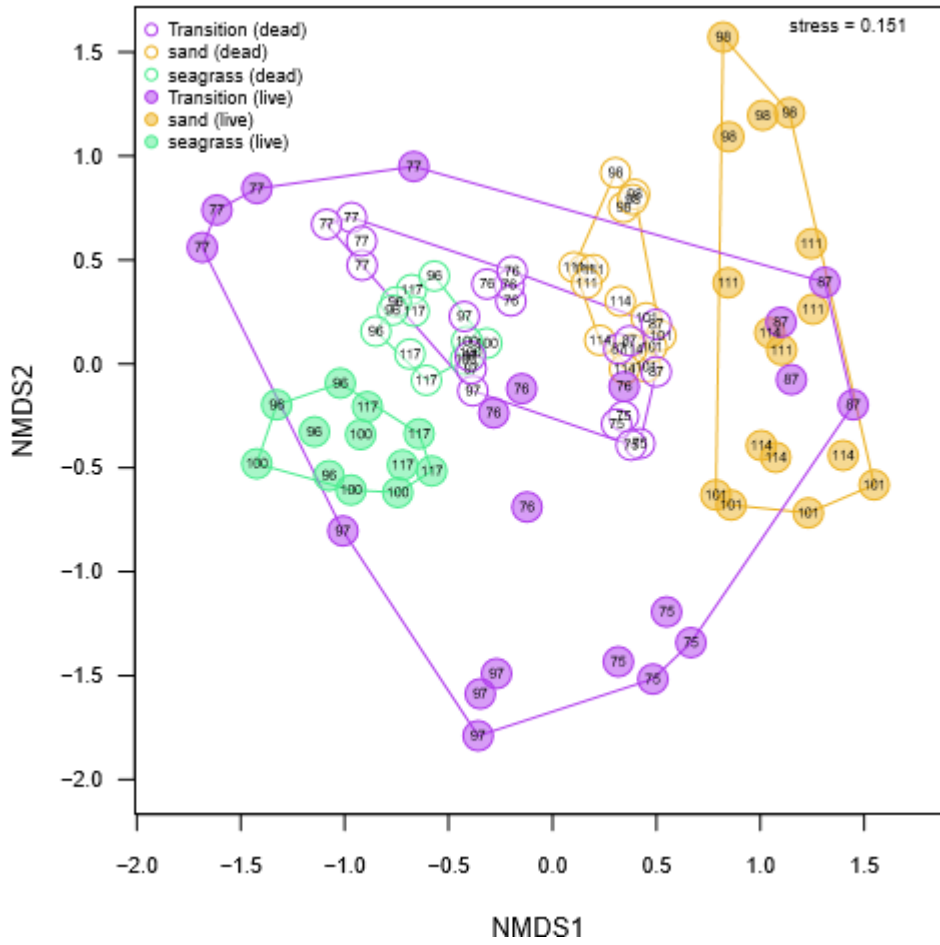

**Figure S2.** Comparison of LA and DA of samples for seagrass, open sand, and transition habitats using (a) raw-score sample values, and (b) using random sample-standardized abundances to control for small-sample bias (10,000 iterations). Indices are 1) Spearman’s non-parametric rank-order correlation of species abundances (Spearman’s rho) and 2) live-dead community similarity using Jaccard-Chao’s similarity index with an adjustment to control for the effects of unseen species (Chao et al. 2005). Samples plotting in the top-right quadrat have the highest fidelity, while samples plotting lower have reduced fidelity. Triangles represent respective group centroids. Respective p-values are superimposed in the lower left corner.

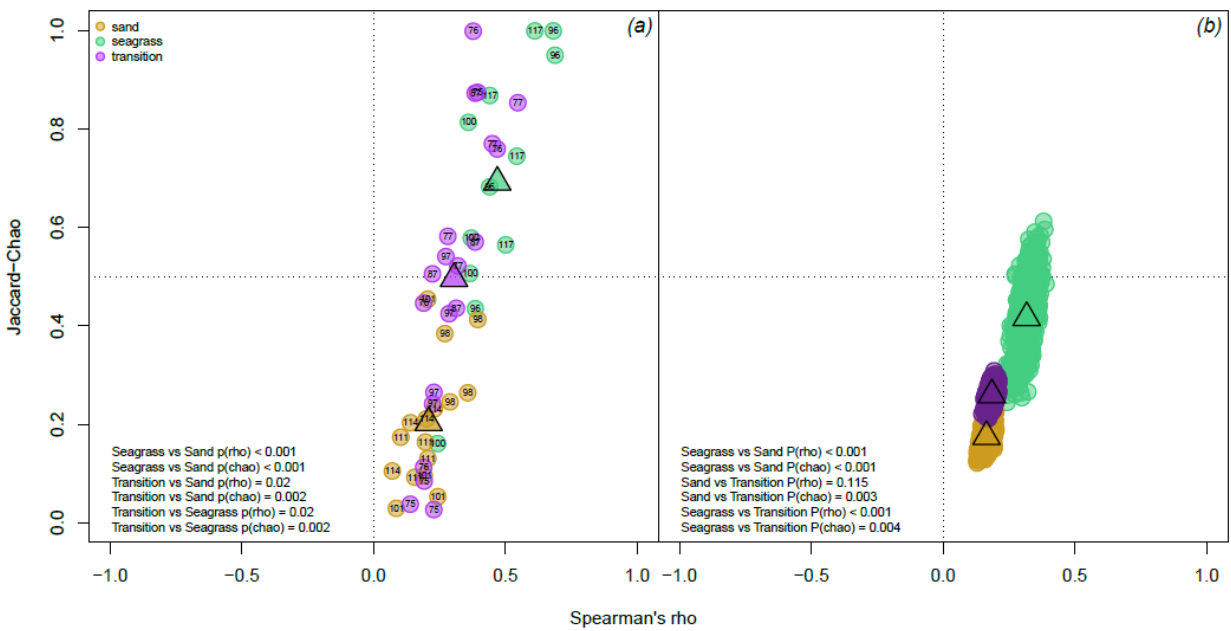

Supplement: rspb20191861supp6.pdf [file rspb20191861supp6.pdf]
